# Supplementary material for: Exosome-mediated delivery of Cas9 ribonucleoprotein complexes for tissue-specific gene therapy of liver diseases
Source: PubMed Central journal article supplement — Sci Adv. 2022 Sep 14;8(37):eabp9435. doi: 10.1126/sciadv.abp9435 (PMC9473578; doi:10.1126/sciadv.abp9435), 2022-09-14
Supplement: sciadv.abp9435_sm.pdf [file sciadv.abp9435_sm.pdf]

Supplementary Materials for  
**Exosome-mediated delivery of Cas9 ribonucleoprotein complexes for  
tissue-specific gene therapy of liver diseases**

Tao Wan *et al.*

Corresponding author: Xiangrui Liu, [xiangrui@zju.edu.cn](mailto:xiangrui@zju.edu.cn); Yuan Ping, [pingy@zju.edu.cn](mailto:pingy@zju.edu.cn);  
Tianhua Zhou, [tzhou@zju.edu.cn](mailto:tzhou@zju.edu.cn)

*Sci. Adv.* **8**, eabp9435 (2022)  
DOI: 10.1126/sciadv.abp9435

**This PDF file includes:**

Figs. S1 to S23  
Tables S1 and S2

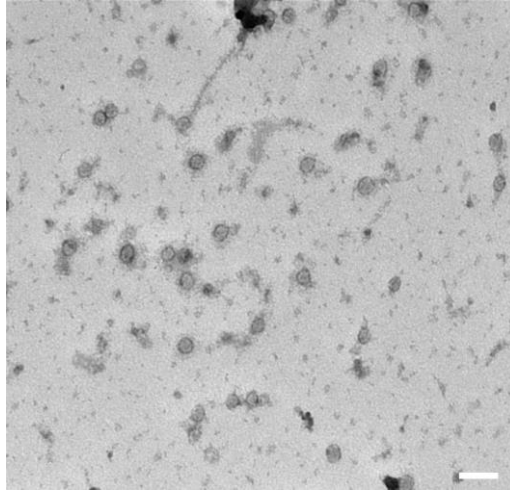

**Fig. S1.** The typical contracted TEM image of the exosome in Figure 2D. Scale bar = 100 nm.

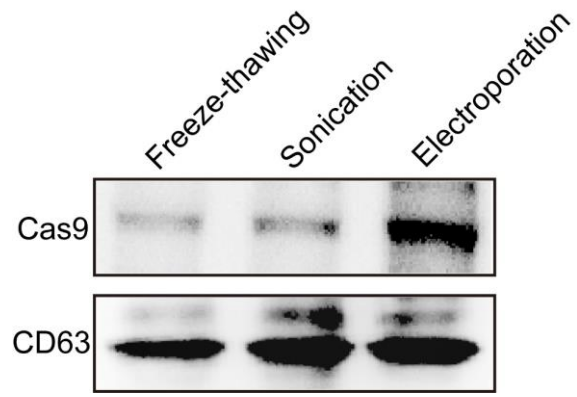

**Fig. S2. Loading capabilities of various exogenous approaches.**

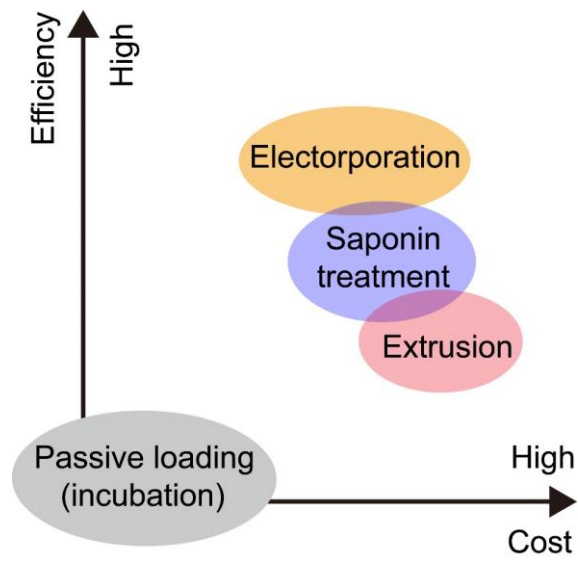

**Fig. S3. Available exogenous loading methods as a function of loading efficacy and costs for large-scale production.**

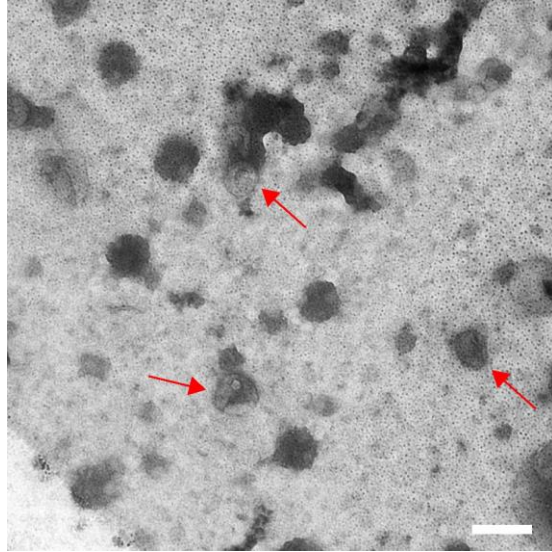

**Fig. S4.** The typical TEM image of exosome<sup>RNP</sup>. The red arrows indicating exosome<sup>RNP</sup> particles. Scale bar = 200 nm.

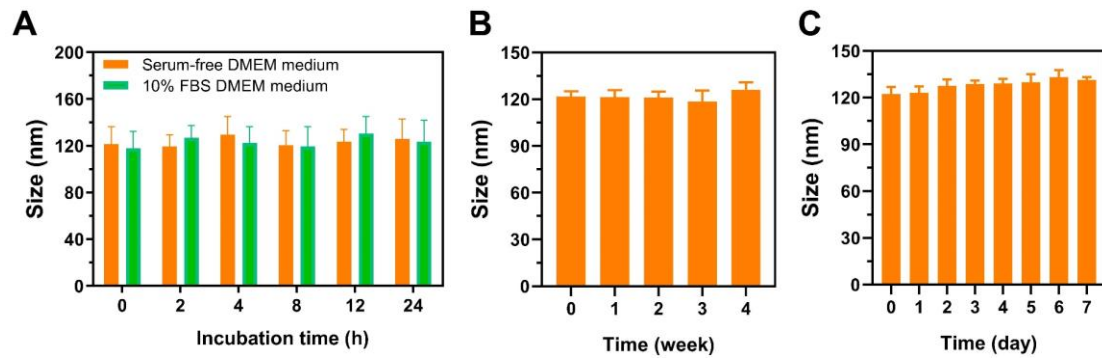

**Fig. S5. Stability of exosome<sup>RNP</sup> nanocomplexes.** (A) The particle size variation of exosome<sup>RNP</sup> nanocomplexes in the culture DMEM medium with or without serum. (B-C) Size of exosome<sup>RNP</sup> nanocomplexes stored for -80 °C (B) and 4 °C (C). Mean  $\pm$  SD;  $n = 3$ .

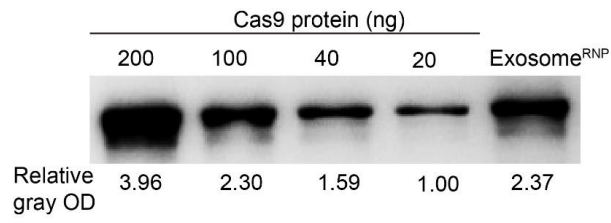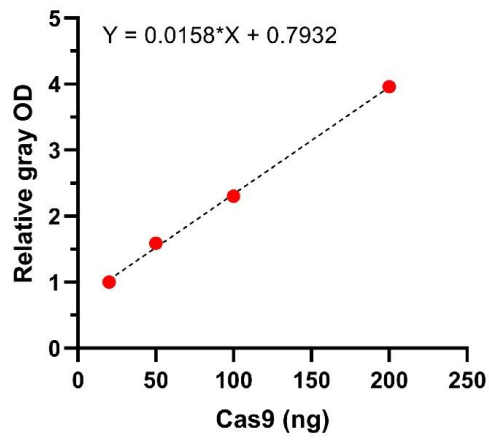

**Fig. S6.** Western blot analysis to determine the loading of Cas9 protein in exosome.

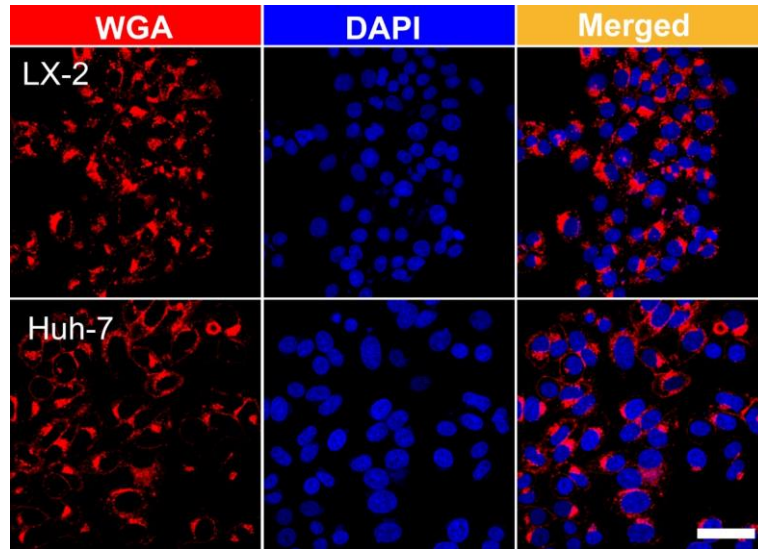

**Fig. S7.** Cytosolic delivery of WGA-labeled exosome into LX-2 and Huh-7 cells. Scale bar = 25  $\mu\text{m}$ .



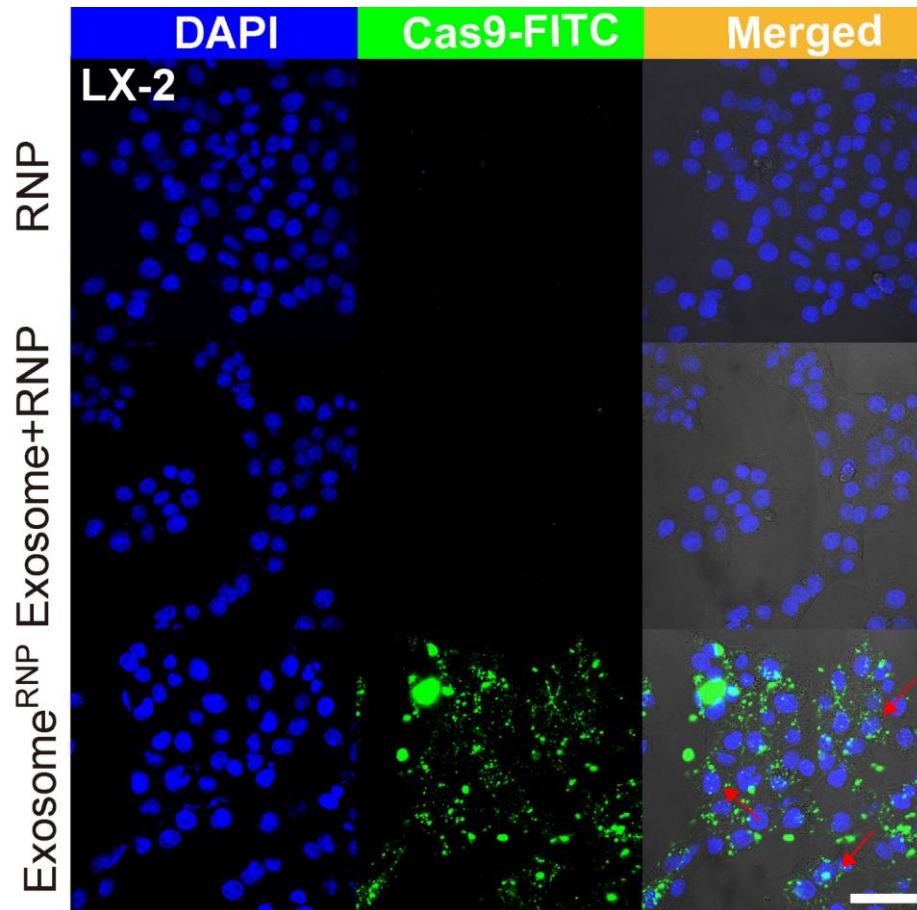

**Fig. S8. Cytosolic delivery of Cas9-FITC into LX-2 cells by exosomes for 4 hours.** Cas9-FITC and exosome+Cas9-FITC were used as negative controls. The red arrows point at the efficient translocation of Cas9-FITC/sgRNA RNP into the nuclei. These pictures correspond to Figure 2H.

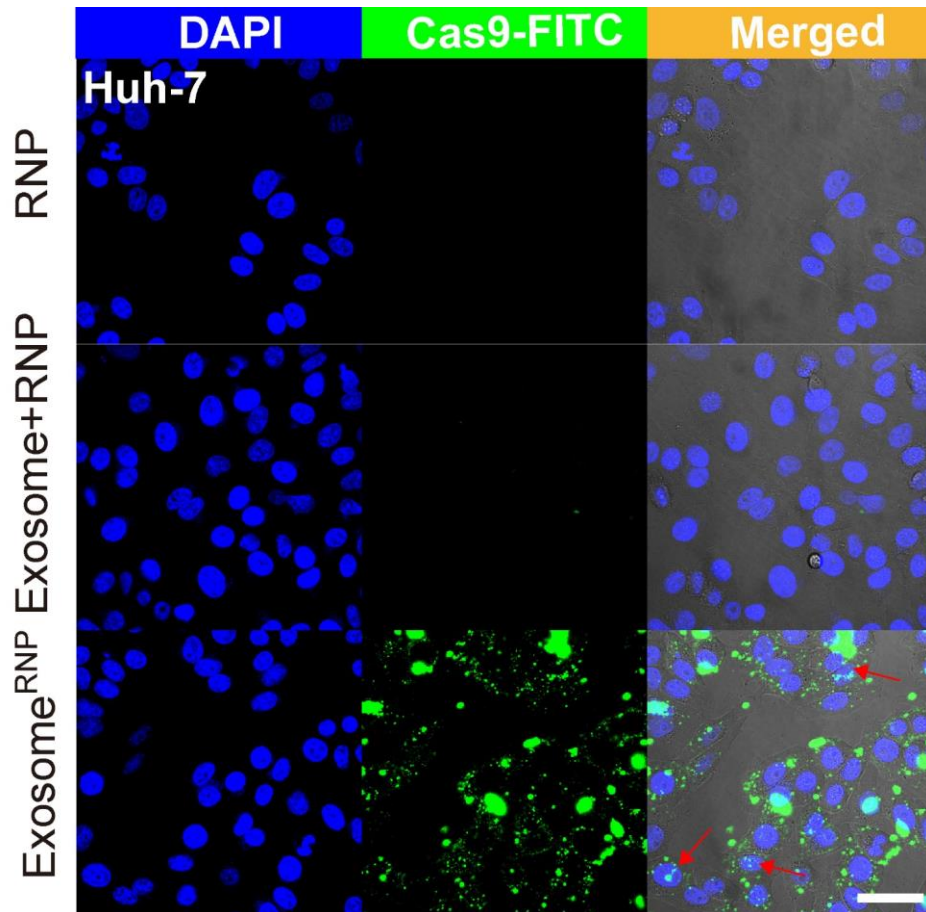

**Fig. S9. Cytosolic delivery of Cas9-FITC into Huh-7 cells by exosomes for 4 hours.** Cas9-FITC and exosome+Cas9-FITC were used as negative controls. The red arrows point at the efficient translocation of Cas9-FITC/sgRNA RNP into the nuclei. These pictures correspond to Figure 2I.

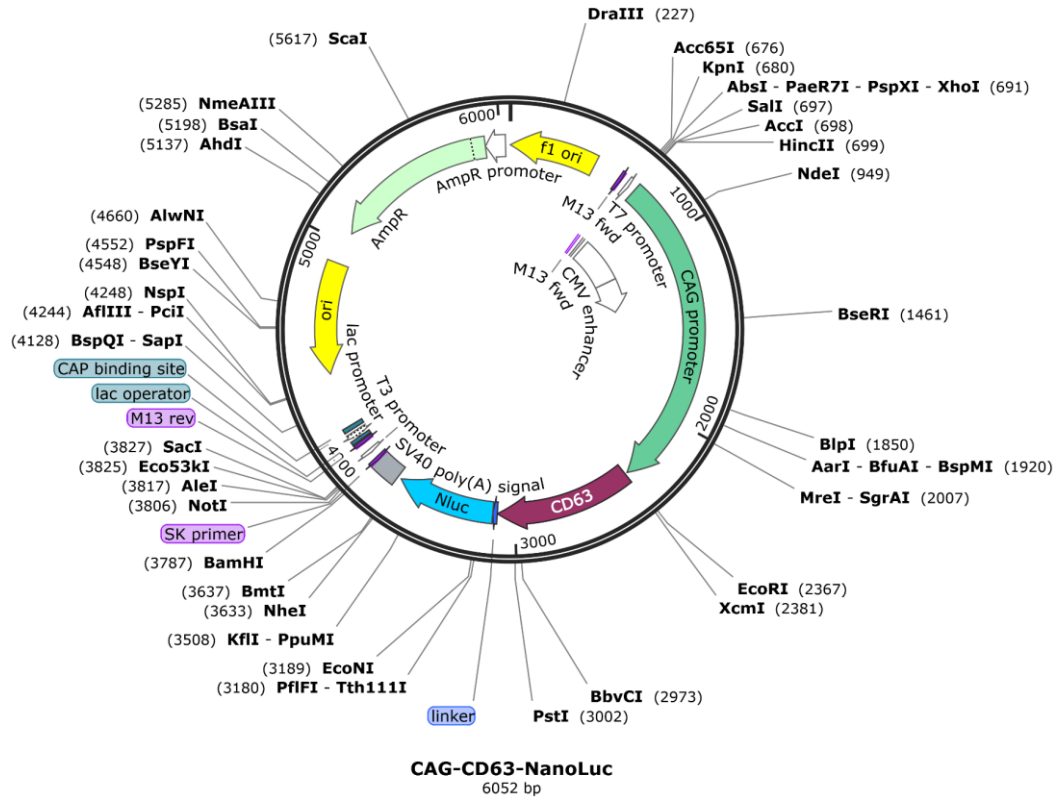

**Fig. S10. Plasmid map of CAG-CD63-NanoLuc DNA vector.**

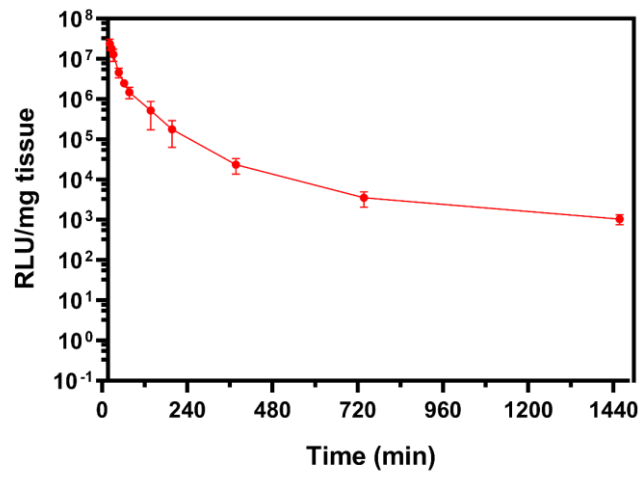

**Fig. S11. Time-course of liver CD63-NanoLuc activity after systemic administration of CD63-NanoLuc-exosome<sup>RNP</sup> nanocomplexes. Mean  $\pm$  SD;  $n = 3$ .**

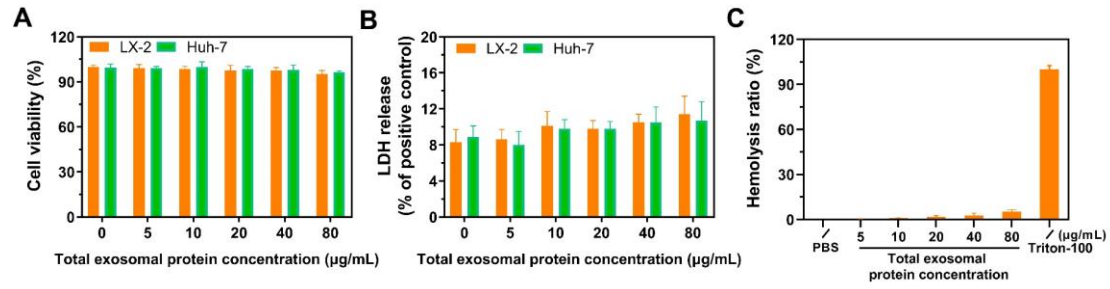

**Fig. S12. Biocompatibility of exosome<sup>RNP</sup> nanocomplexes *in vitro*.** (A) Cell viability of LX-2 and Huh-7 cells after 24 h incubation with exosome<sup>RNP</sup> nanocomplexes. Cell viability was determined by MTT assay. (B) LDH release assay. (C) Hemolytic activity of the exosome<sup>RNP</sup> nanocomplexes. Total exosomal protein concentration ranges from 5 to 80 µg/mL. PBS and Triton-100 (0.5%) were used as the negative and positive controls, respectively. Mean ± SD;  $n = 6$ .

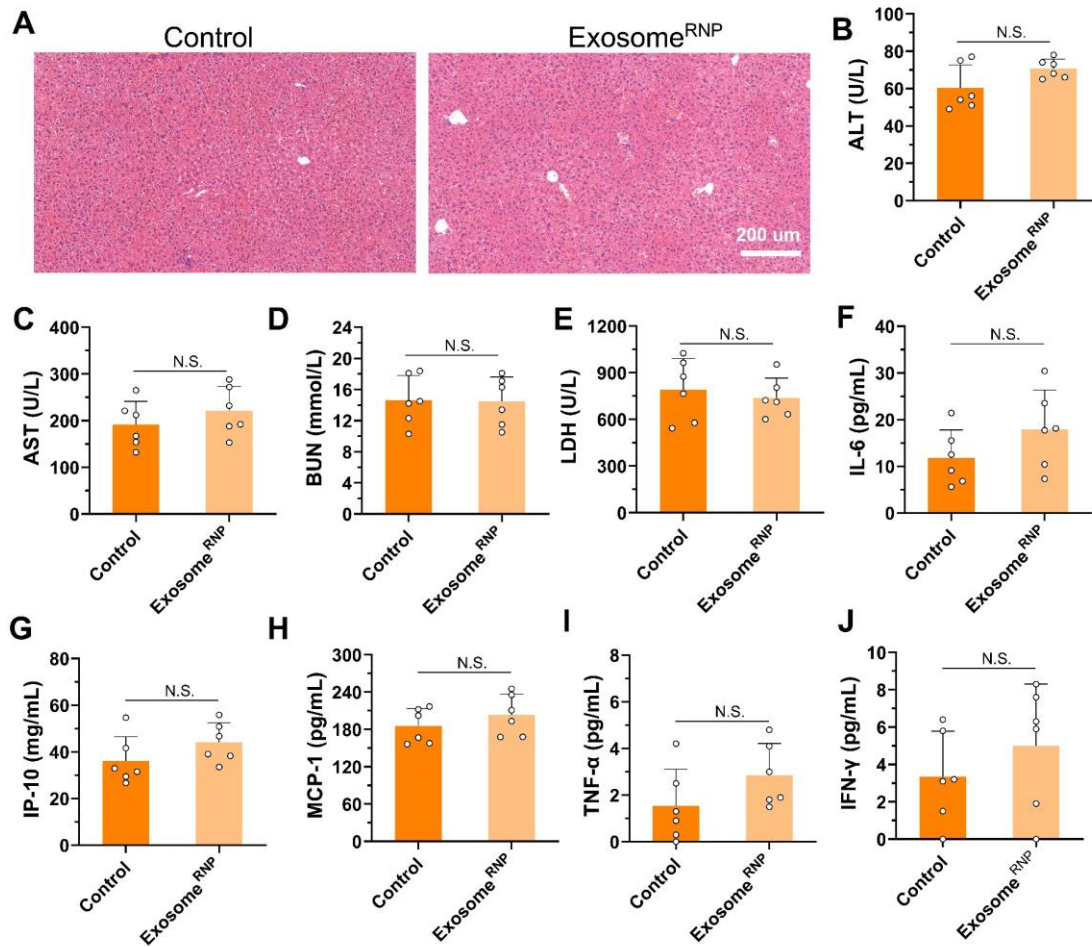

**Fig. S13. Systemic toxicity and immunogenicity evaluation of exosome<sup>RNP</sup> via intravenous injection.** (A) H&E staining of liver sections from healthy mice after the exosome<sup>RNP</sup> treatment. (B-E) Serum levels of ALT, AST, BUN, and LDH in healthy mice treated with or without exosome<sup>RNP</sup>. (F-J) Levels of five major inflammatory cytokines in healthy mice treated with or without exosome<sup>RNP</sup>. Statistical significance was calculated by Students' t-test (mean ± S.D.,  $n = 6$ ). N.S. represents no significant difference.

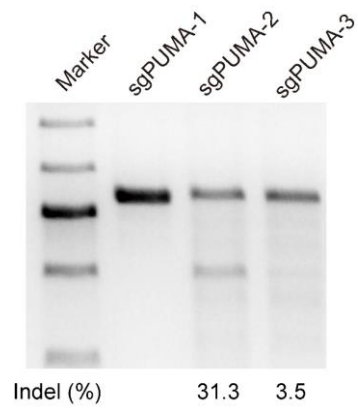

**Fig. S14. Frequency of indel mutation detected by T7E1 assay from AML-12 cells at *PUMA* locus of different sgRNAs.**

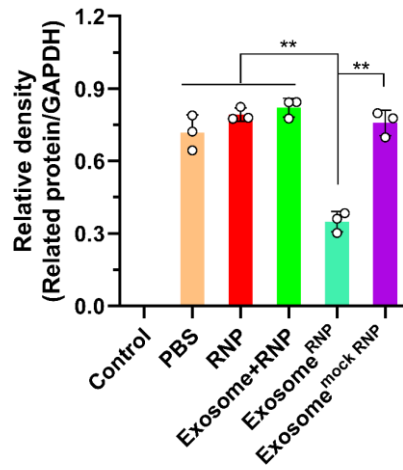

**Fig. S15.** Protein levels were quantified by densitometry after the specified treatments. Mean  $\pm$  SD;  $n = 3$  (one-way ANOVA with a Tukey's post-hoc test,  $**P < 0.01$ ).



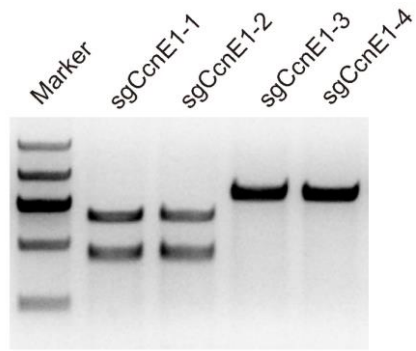

Indel (%) 39.8 38.9

**Fig. S16. Frequency of indel mutation detected by T7E1 assay from AML-12 cells at *CcnE1* locus of different sgRNAs.**

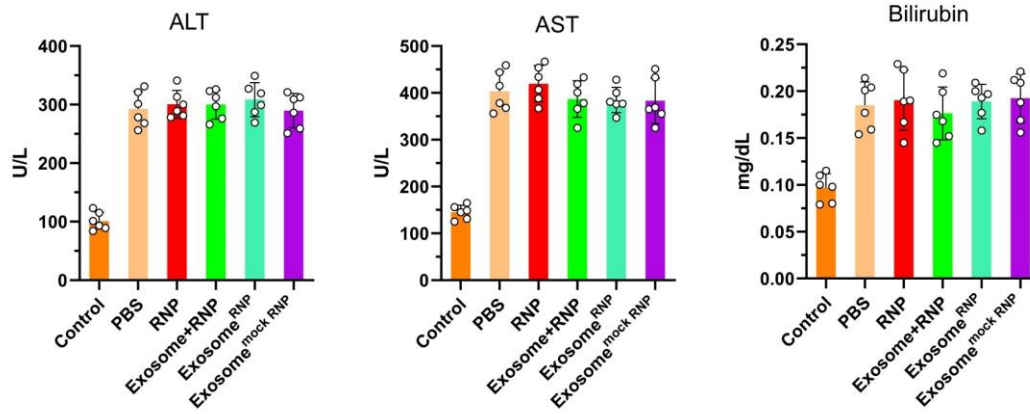

**Fig. S17.** Serum ALT and AST activities were measured to evaluate global liver injury. Bilirubin content in serum was determined as a measure of liver function. Mean  $\pm$  SD;  $n = 6$ .

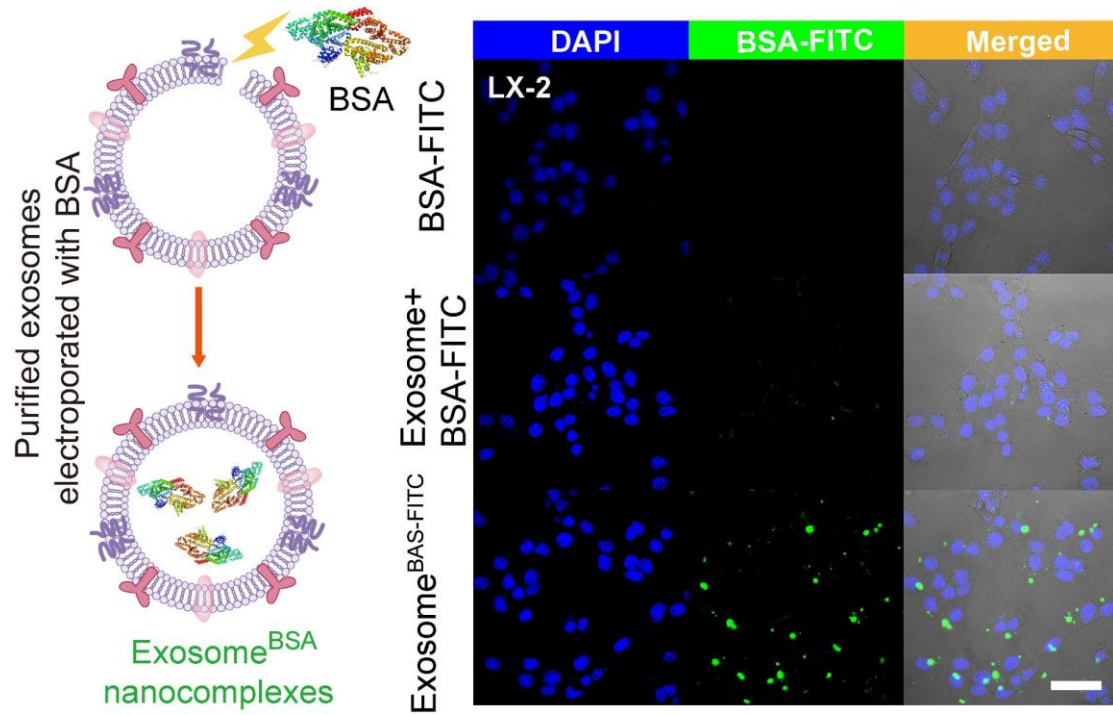

**Fig. S18.** Preparation of exosome<sup>BSA-FITC</sup> complexes and cytosolic delivery of BSA-FITC into LX-2 cells by exosomes for 4 hours. Free Cas9-FITC and exosome+Cas9-FITC were used as negative controls.

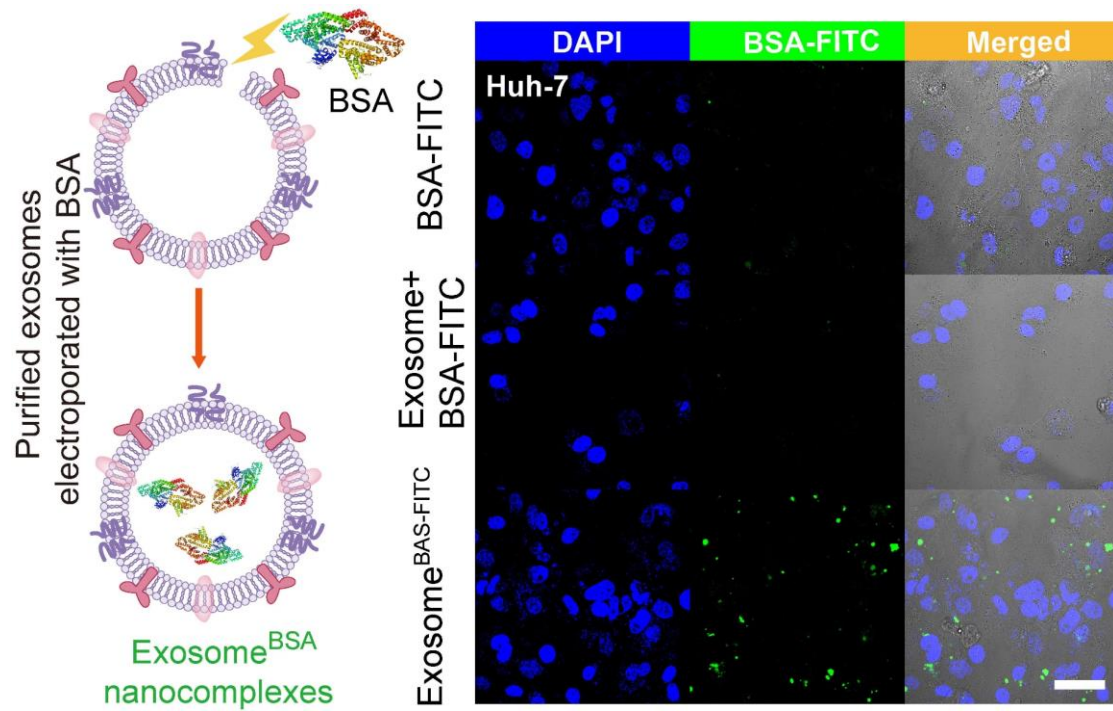

**Fig. S19. Preparation of exosome<sup>BSA-FITC</sup> complexes and cytosolic delivery of BSA-FITC into Huh-7 cells by exosomes for 4 hours.** Free Cas9-FITC and exosome+Cas9-FITC were used as negative controls.

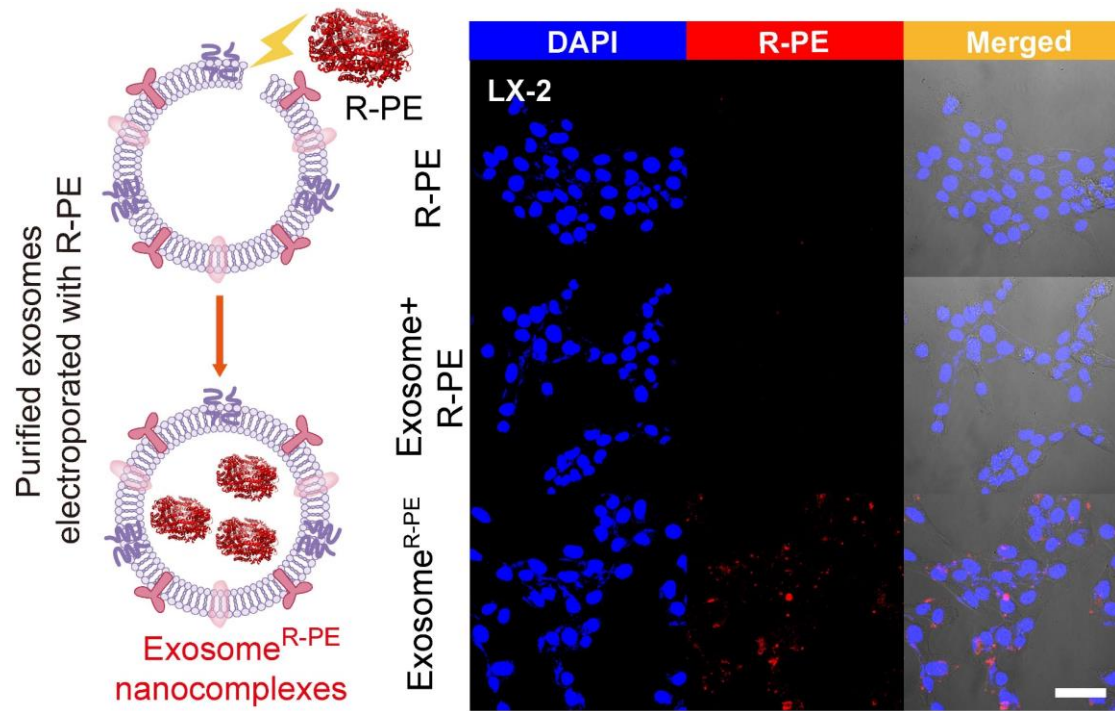

**Fig. S20. Preparation of  $\text{exosome}^{\text{R-PE}}$  complexes and cytosolic delivery of R-PE into LX-2 cells by exosomes for 4 hours. Free R-PE and exosome+R-PE were used as negative controls. Scale bar = 25  $\mu\text{m}$ .**

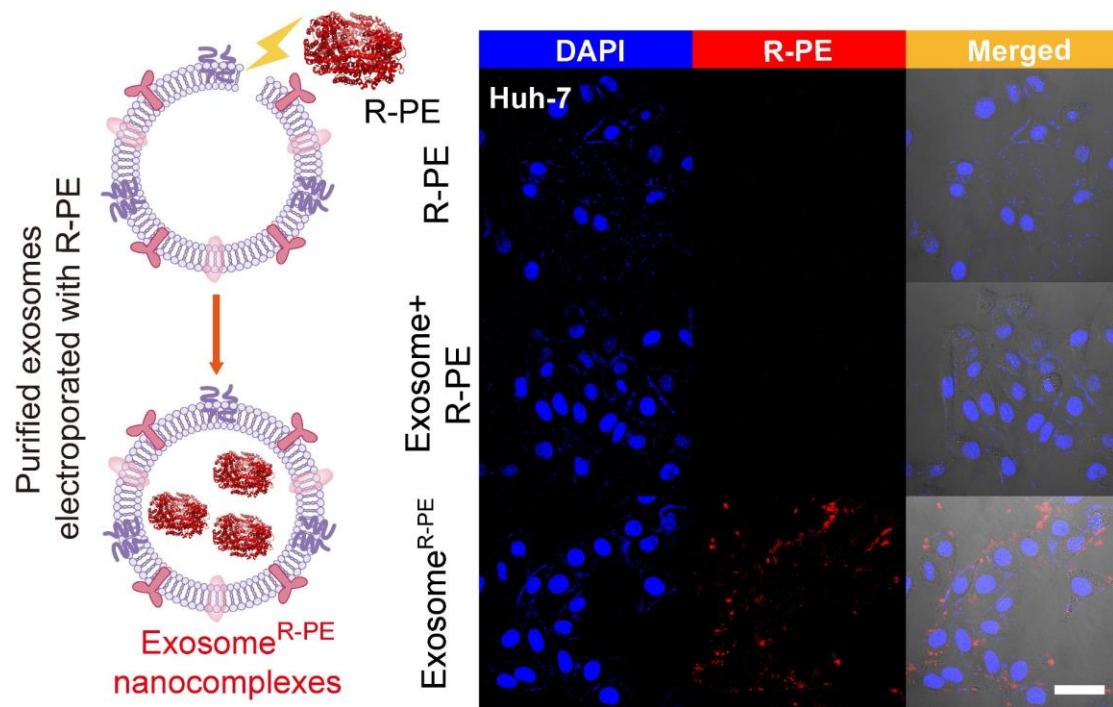

**Fig. S21. Preparation of exosome<sup>R-PE</sup> complexes and cytosolic delivery of R-PE into Huh-7 cells by exosomes for 4 hours.** Free R-PE and exosome+R-PE were used as negative controls. Scale bar = 25  $\mu$ m.

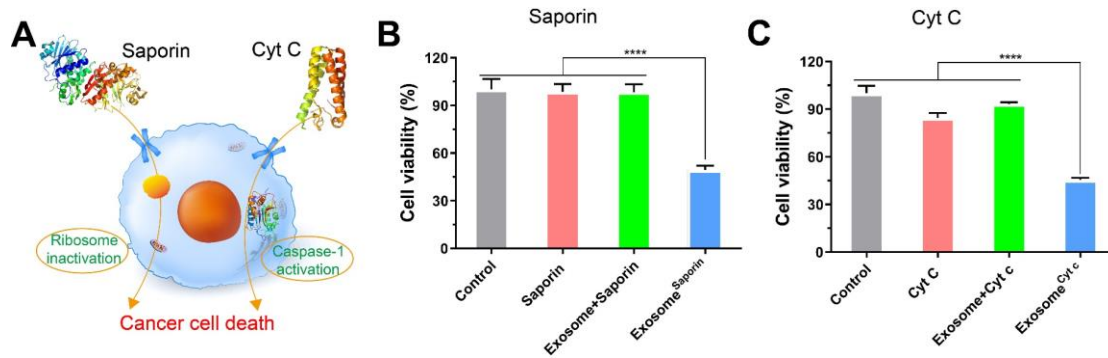

**Fig. S22. Cytosolic delivery of toxic proteins.** (A) Cytosolic delivery of saporin and Cyt C into cancer cells leads to ribosome inactivity and Caspase-1 activation, respectively, and cell death. (B-C) Cell viability of Huh-7 cells treated with exosome<sup>saporin</sup> (B) and exosome<sup>Cyt C</sup> (C) determined by MTT assay, respectively. Mean  $\pm$  SD;  $n = 6$  (one-way ANOVA with a Tukey's post-hoc test, \*\*\*\* $P < 0.0001$ ).

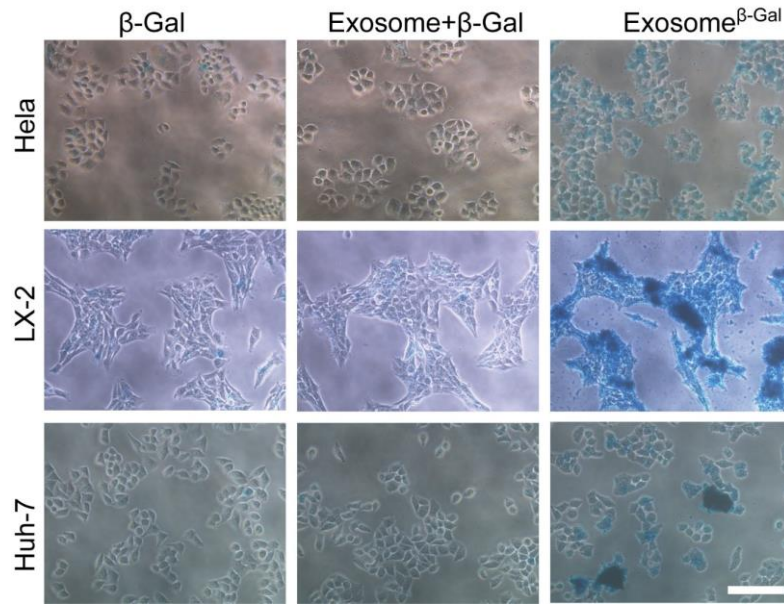

**Fig. S23. Cytosolic delivery of  $\beta$ -Gal into Hela, LX-2, and Huh-7 cells, respectively.** Scale bar = 25  $\mu$ m.



**Table S1. Sequences of sgRNA used in this study.**

| Nucleic Acid ID | Sequences (5'-3')                                                                   | Notes       |
|-----------------|-------------------------------------------------------------------------------------|-------------|
| sgPUMA-1-F      | GAAATTAATACGACTCACTATAGGGGGCACTCACCGTCCG<br>GGCGTTTTAGAGCTAGAAATAGCA                | T7 Promoter |
| sgPUMA-2-F      | GAAATTAATACGACTCACTATAGGGCCGCTCGTACTGCGCG<br>TTGGTTTTAGAGCTAGAAATAGCA               | T7 Promoter |
| sgPUMA-3-F      | GAAATTAATACGACTCACTATAGGGTCGCGGGCTAGACCC<br>TCTAGTTTTAGAGCTAGAAATAGCA               | T7 Promoter |
| sgCcnE1-1-F     | GAAATTAATACGACTCACTATAGGTTTCACAGTCTTGTCAA<br>TCTGTTTTAGAGCTAGAAATAGCA               | T7 Promoter |
| sgCcnE1-2-F     | GAAATTAATACGACTCACTATAGGTTTCAGTCCGCTCCAGA<br>AAAGTTTTAGAGCTAGAAATAGCA               | T7 Promoter |
| sgCcnE1-3-F     | GAAATTAATACGACTCACTATAGGGGATGATAATTCAGCA<br>TGCGTTTTAGAGCTAGAAATAGCA                | T7 Promoter |
| sgCcnE1-4-F     | GAAATTAATACGACTCACTATAGGACAATGAGCTTGAATA<br>CCCCGTTTTAGAGCTAGAAATAGCA               | T7 Promoter |
| sgKAT5-F        | GAAATTAATACGACTCACTATAGGGATTGATGGACGTAAG<br>AACAGTTTTAGAGCTAGAAATAGCA               | T7 Promoter |
| sgRNA-R         | AAAAGCACCGACTCGGTGCCACTTTTTCAAGTTGATAACGG<br>ACTAGCCTTATTTAACTTGCTATTTCTAGCTCTAAAAC |             |

**Table S2. Primer sequences for PCR amplification of target genes.**

| <b>Nucleic Acid ID</b> | <b>Sequences (5'-3')</b> |
|------------------------|--------------------------|
| PUMA-1-F               | ATCCTGCAGCCTTTGCGAGC     |
| PUMA-1-R               | TAACAGCCCATCAGGCGAGGGA   |
| PUMA-2-F               | TGGATGGTGACCACGCCCTTT    |
| PUMA-2-R               | AACCGGGCTCTGGGGGTTTCAT   |
| PUMA-3-F               | AGCACCCCTTCTGCGCTCTT     |
| PUMA-3-R               | AAGACCACACTGGCCACACCCT   |
| CcnE1-1-F              | TCCAAGCCCAAGTCTGAGCCA    |
| CcnE1-1-R              | TGGCCTGCAGCTCTGTTTTGGG   |
| CcnE1-2-F              | TCCAAGCCCAAGTCTGAGCCA    |
| CcnE1-2-R              | TGGCCTGCAGCTCTGTTTTGGG   |
| CcnE1-3-F              | ACCACCATGTGGTTGCTGGGA    |
| CcnE1-3-R              | AGCCGGAACCTCCAAGCTCA     |
| CcnE1-4-F              | ACCACCATGTGGTTGCTGGGA    |
| CcnE1-4-R              | AGCCGGAACCTCCAAGCTCA     |
| KAT5-F                 | GCTGCCTTCCCAGCACCCCTC    |
| KAT5-R                 | GCCTGCTGCTGGGTA CTGCC    |
